# Supplementary figures and images for: Smoking and mental illness: results from population surveys in Australia and the United States
Source: Springer Nature journal article supplement (doi:10.1186/1471-2458-9-285), 2009-08-07

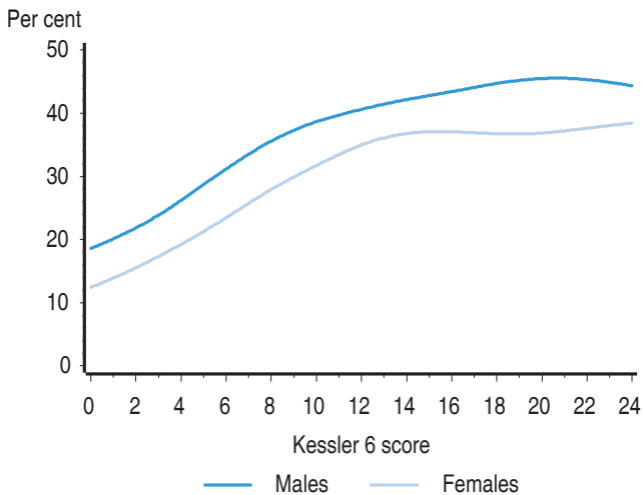

Supplement: 12889_2009_1688_MOESM3_ESM.pdf [file 12889_2009_1688_MOESM3_ESM.pdf]
